# Supplementary material
Source: PubMed Central journal article supplement (PMC4289950)
Supplement: npp2014211x1.pdf [file npp2014211x1.pdf]

Supporting Online Material

**Investing in the future: Stimulation of the medial prefrontal cortex reduces discounting of delayed rewards.**

Sang Soo Cho<sup>2,3</sup>, Yuko Koshimori<sup>2,3</sup>, Kelly Aminian<sup>2,3</sup>, Ignacio Obeso<sup>2,3</sup>, Pablo Rusjan<sup>3</sup>, Anthony E. Lang<sup>1</sup> Zafiris J. Daskalakis<sup>4</sup>, Sylvain Houle<sup>3</sup> and Antonio P. Strafella<sup>1,2,3</sup>

**Table S1. Demographics of participants.**

|                          | Mean (SD)    | Range   |
|--------------------------|--------------|---------|
| Age (yr)                 | 22.1 (2.9)   | 18 - 27 |
| Gender (female : male)   | 11:13        |         |
| BDI                      | 2.75 (2.85)  | 0 - 9   |
| SAST                     | 18.3 (2.58)  | 10 - 21 |
| BIS total                | 59.88 (8.41) | 49 - 84 |
| Attentional impulsivity  | 15.29 (2.77) | 11 - 24 |
| Motor impulsivity        | 22.70 (3.83) | 16 - 30 |
| Nonplanning impulsivity  | 21.88 (4.60) | 14 - 30 |
| Stimulation strength (%) | 27.42 (4.12) | 20 - 38 |

BDI: Beck depression inventory; SAST: Short Anxiety Screening Test; BIS: Barratt impulsivity scale.

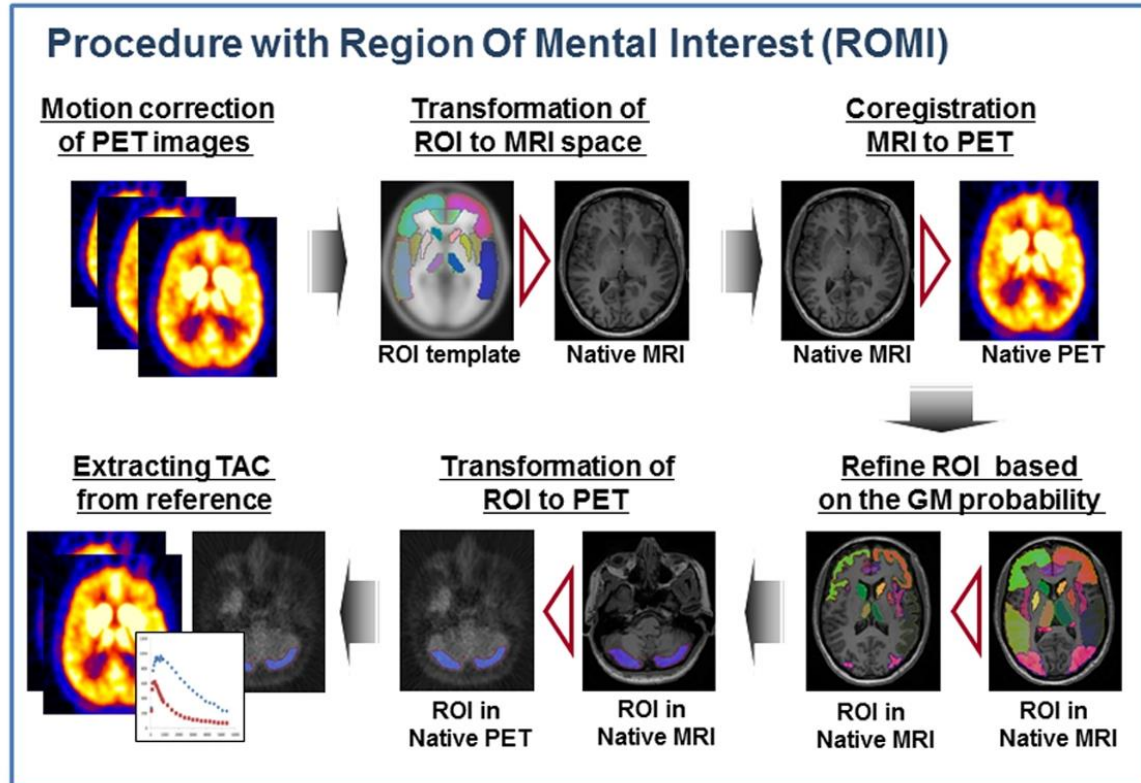

**Fig S1.** Procedure for imaging analysis.
